# Supplementary material
Source: PubMed Central journal article supplement (PMC8285270)
Supplement: NIHMS1719713-supplement-1.pdf [file NIHMS1719713-supplement-1.pdf]

## Supplementary information

### Quantitative measurement of macromolecular tissue properties in white and gray matter in healthy aging and amnesic MCI

---

Elveda Gozdas<sup>1</sup>, Hannah Fingerhut<sup>1</sup>, Hua Wu<sup>2</sup>, Jennifer L. Bruno<sup>1</sup>, Lauren Dacorro<sup>1</sup>, Booil Jo<sup>1</sup>,  
Ruth O'Hara<sup>1</sup>, Allan L. Reiss<sup>1</sup>, S.M. Hadi Hosseini<sup>1</sup>

<sup>1</sup>Department of Psychiatry and Behavioral Sciences, Stanford University School of Medicine,  
Stanford, CA

<sup>2</sup>Center for Cognitive and Neurobiological Imaging, Stanford University, Stanford, CA

### Supplemental Data

**Table S1.** Demographic, clinical and neuropsychological characteristics of the sample

|                                | <b>HC<br/>N=45</b> | <b>aMCI<br/>N=19</b> | <b>Statistics*</b> |
|--------------------------------|--------------------|----------------------|--------------------|
| <b>Age, years (SD)</b>         | 73.5(5.9)          | 73.6(5.5)            | <i>p</i> =0.97     |
| <b>Gender (F/M)</b>            | 32/13              | 8/11                 | <i>p</i> =0.047    |
| <b>Years of Education (SD)</b> | 17.88(3.5)         | 18.55(3)             | <i>p</i> =0.44     |
| <b>MMSE (SD)</b>               | 28.97(1.05)        | 27.26(1.7)           | <i>p</i> =0.0005   |
| <b>ICV (SD)</b>                | 1396.8(120.1)      | 1462.2(136.8)        | <i>p</i> =0.34     |
| <b>SDMT (SD)</b>               | 71.66(16.8)        | 58.7(9.8)            | <i>p</i> =0.001    |
| <b>PSMT (SD)</b>               | 9.66(5.7)          | 5.5(4.3)             | <i>p</i> =0.017    |
| <b>Rey (SD)</b>                | 22.02(5)           | 17.9(5.5)            | <i>p</i> =0.008    |

\* p values derived from two-sample t-test, Chi-square test or ANOVA with age, gender, education and intracranial volume as covariates.

HC: Healthy Control; aMCI: amnesic Mild Cognitive Impairment; MMSE: Mini-Mental State Examination; ICV: intracranial volume ( $cm^3$ ); SDMT: Symbol Digit Modalities Test; PSMT: Picture Sequence Memory Test; Rey: Auditory Verbal Learning Test

**Table S2. Statistics for age association for each three white matter measures**

| <b>WM<br/>Microstructure</b> | <b>Tract</b>               | <b>Mean (SD)</b>           | <b><math>\beta</math></b> | <b>p (FDR<br/>corrected)</b> |            |
|------------------------------|----------------------------|----------------------------|---------------------------|------------------------------|------------|
| <b>MTV</b>                   | Left Thalamic Radiation    | 0.274(0.009)               | -0.2569                   | 0.16285714                   |            |
|                              | Right Thalamic Radiation   | 0.2737(0.01)               | -0.14                     | 0.01827931                   |            |
|                              | Left Corticospinal         | 0.275(0.007)               | -0.37416574               | 0.095                        |            |
|                              | Right Corticospinal        | 0.275(0.008)               | -0.37682887               | 0.04238462                   |            |
|                              | Left Cingulum Cingulate    | 0.271(0.011)               | -0.4494441                | 0.03081081                   |            |
|                              | Right Cingulum Cingulate   | 0.273(0.01)                | -0.40249224               | 0.03081081                   |            |
|                              | Left Cingulum Hippocampus  | 0.246(0.014)               | -0.36742346               | 0.03081081                   |            |
|                              | Right Cingulum Hippocampus | 0.249(0.017)               | -0.24899799               | 0.16285714                   |            |
|                              | Callosum Forceps Minor     | 0.256(0.04)                | -0.54221767               | 0.05004878                   |            |
|                              | Left IFOF                  | 0.267(0.01)                | -0.6                      | 0.00095                      |            |
|                              | Right IFOF                 | 0.266(0.01)                | -0.59160798               | 0.00095                      |            |
|                              | Left ILF                   | 0.271(0.009)               | -0.4472136                | 0.036                        |            |
|                              | Right ILF                  | 0.271(0.01)                | -0.50990195               | 0.0285                       |            |
|                              | Left SLF                   | 0.281(0.009)               | -0.46904158               | 0.0095                       |            |
|                              | Right SLF                  | 0.282(0.009)               | -0.41231056               | 0.0285                       |            |
|                              | Left Uncinate              | 0.240(0.013)               | -0.5                      | 0.67363636                   |            |
|                              | Right Uncinate             | 0.238(0.01)                | -0.54772256               | 0.03081081                   |            |
|                              | Left Arcuate               | 0.289(0.009)               | -0.51961524               | 0.0095                       |            |
|                              | Right Arcuate              | 0.286(0.012)               | -0.4                      | 0.00316667                   |            |
|                              | <b>MD</b>                  | Left Thalamic Radiation    | 0.918(0.08)               | 0.5                          | 0.0019     |
|                              |                            | Right Thalamic Radiation   | 0.913(0.08)               | 0.54772256                   | 0.0007125  |
|                              |                            | Left Corticospinal         | 0.915(0.05)               | 0.4472136                    | 0.00673636 |
|                              |                            | Right Corticospinal        | 0.928(0.05)               | 0.47958315                   | 0.00488571 |
|                              |                            | Left Cingulum Cingulate    | 0.869(0.03)               | 0.54772256                   | 0.00095    |
|                              |                            | Right Cingulum Cingulate   | 0.869(0.04)               | 0.56568542                   | 0.000627   |
|                              |                            | Left Cingulum Hippocampus  | 0.935(0.05)               | 0.46904158                   | 0.004275   |
|                              |                            | Right Cingulum Hippocampus | 0.964(0.06)               | 0.51961524                   | 0.00204529 |
| Callosum Forceps Minor       |                            | 1.012(0.07)                | 0.45825757                | 0.01604444                   |            |
| Left IFOF                    |                            | 0.984(0.08)                | 0.64031242                | 0.00008835                   |            |
| Right IFOF                   |                            | 1.004(0.09)                | 0.70569115                | 0.00001539                   |            |
| Left ILF                     |                            | 0.979(0.06)                | 0.6164414                 | 0.0001425                    |            |
| Right ILF                    |                            | 0.997(0.06)                | 0.70710678                | 0.0000456                    |            |
| Left SLF                     |                            | 0.872(0.05)                | 0.54772256                | 0.00095                      |            |
| Right SLF                    |                            | 0.881(0.05)                | 0.51961524                | 0.0019                       |            |

**FA**

|                            |              |             |            |
|----------------------------|--------------|-------------|------------|
| Left Uncinate              | 0.934(0.06)  | 0.42426407  | 0.01512692 |
| Right Uncinate             | 0.936(0.05)  | 0.65574385  | 0.0000456  |
| Left Arcuate               | 0.891(0.05)  | 0.54772256  | 0.00100846 |
| Right Arcuate              | 0.905(0.05)  | 0.4         | 0.01771071 |
| Left Thalamic Radiation    | 0.325(0.027) | -0.29495762 | 0.25811321 |
| Right Thalamic Radiation   | 0.329(0.028) | -0.39496835 | 0.12286667 |
| Left Corticospinal         | 0.425(0.018) | -0.26832816 | 0.69214286 |
| Right Corticospinal        | 0.411(0.018) | -0.17888544 | 0.97       |
| Left Cingulum Cingulate    | 0.300(0.027) | -0.232379   | 0.171      |
| Right Cingulum Cingulate   | 0.287(0.027) | -0.22135944 | 0.39055556 |
| Left Cingulum Hippocampus  | 0.257(0.027) | -0.36055513 | 0.03081081 |
| Right Cingulum Hippocampus | 0.270(0.031) | -0.25099801 | 0.14553192 |
| Callosum Forceps Minor     | 0.341(0.046) | -0.42426407 | 0.10604651 |
| Left IFOF                  | 0.298(0.026) | -0.42661458 | 0.01368    |
| Right IFOF                 | 0.290(0.022) | -0.62289646 | 0.0001425  |
| Left ILF                   | 0.247(0.017) | -0.41231056 | 0.0285     |
| Right ILF                  | 0.239(0.017) | -0.50990195 | 0.001995   |
| Left SLF                   | 0.223(0.016) | -0.26457513 | 0.11011364 |
| Right SLF                  | 0.234(0.018) | -0.31622777 | 0.049875   |
| Left Uncinate              | 0.246(0.025) | -0.41231056 | 0.12391304 |
| Right Uncinate             | 0.261(0.030) | -0.53851648 | 0.0033     |
| Left Arcuate               | 0.234(0.018) | -0.29154759 | 0.17538462 |
| Right Arcuate              | 0.221(0.020) | -0.2258318  | 0.17538462 |

**Figure S1.** Heatmap of inter- and intra-hemispheric association (Pearson's  $r$ ) among MTV, FA, MD, RD and AD

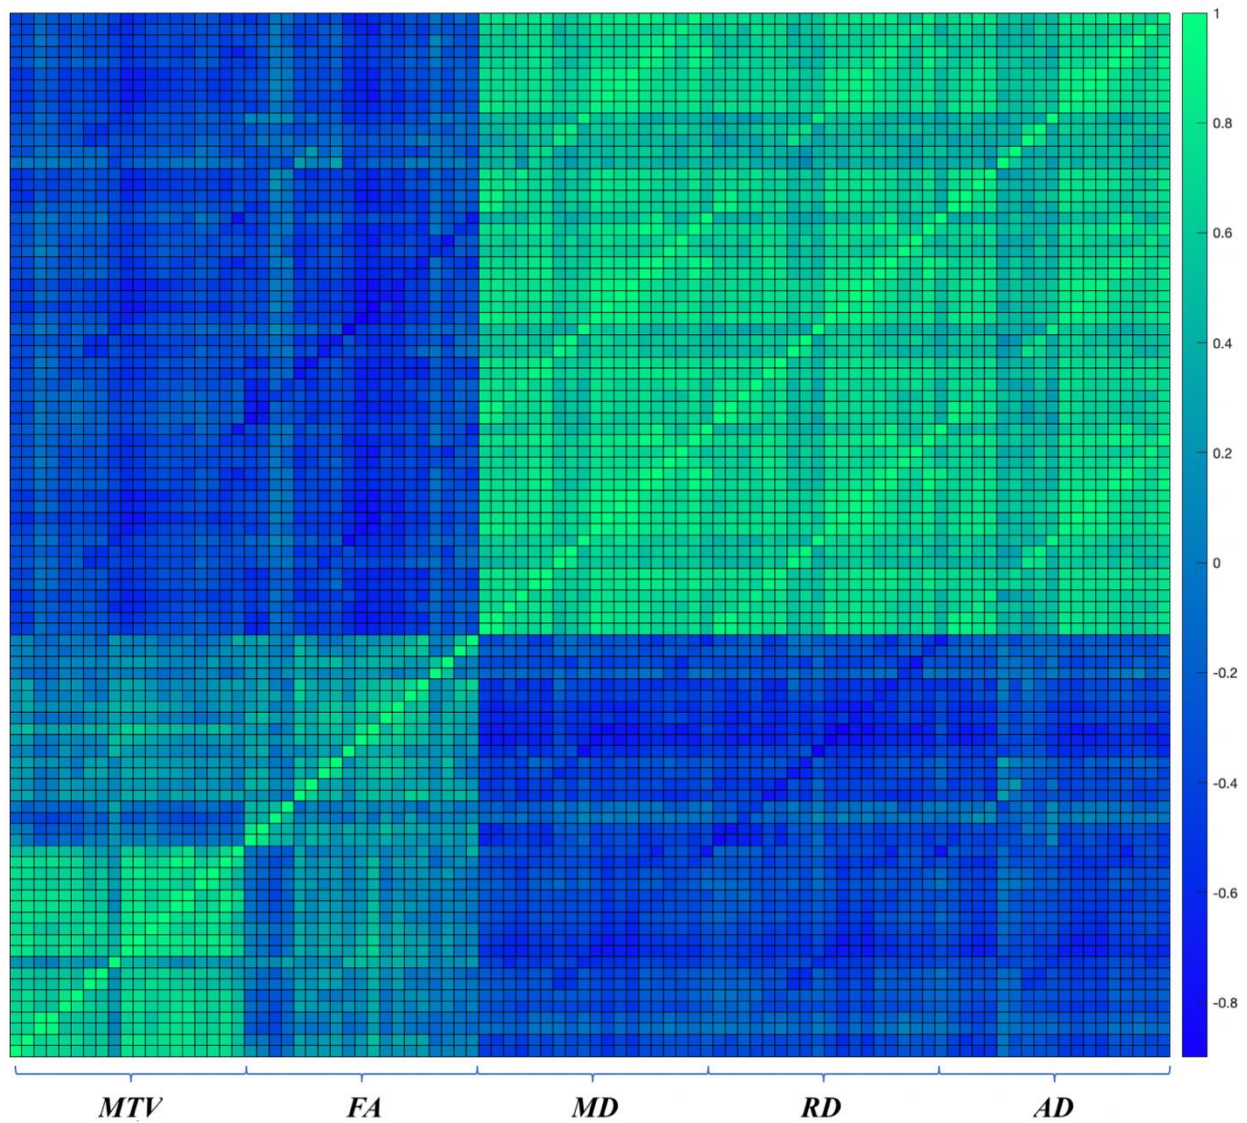

**Figure S2.** Association between volumetric brain MRI measures and age.

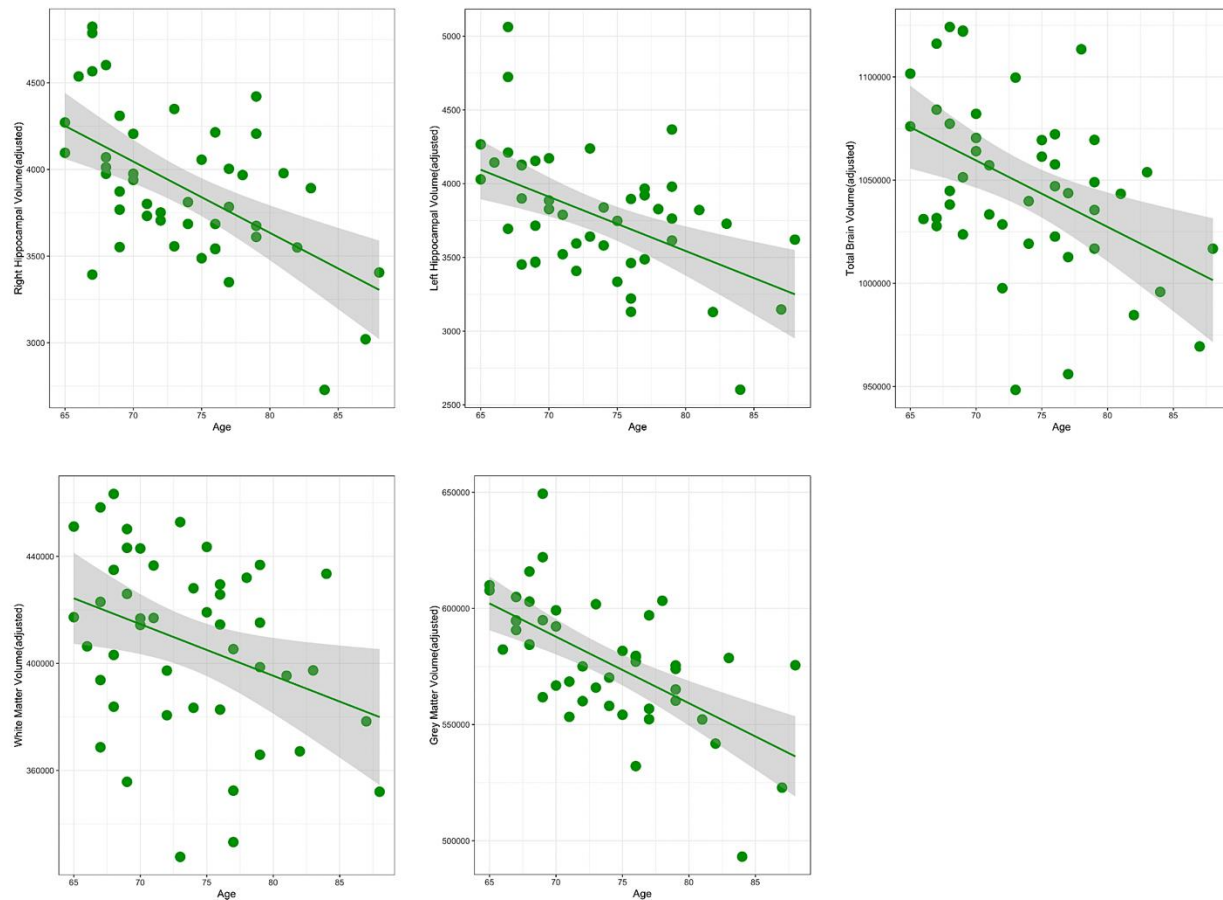

## Supplemental Methods

### Participants

Exclusion criteria for all participants included left-handedness, presence of suicidality, formal diagnosis of a significant psychiatric disease, current regular use of psychotropic medications, opiates, or thyroid medications (except for permitted medications including cholinesterase inhibitors and hypertension medications if stable for at least two months), claustrophobia, non-MRI-compatible materials, post-traumatic or psychotic disorders, bipolar disorder; any

significant neurologic disease including possible and probable dementia, multi-infarct dementia, Parkinson's or Huntington's disease, brain tumor, progressive supranuclear palsy, seizure disorder, subdural hematoma, multiple sclerosis, "uncontrolled" hypertension, history of significant head trauma, current or history of alcohol or substance abuse or dependence within the past 2 years; any significant systemic or unstable medical condition.

Eligible participants underwent a battery of neuropsychological assessments to be included in the study.

### **Cognitive Measures**

The NIH Toolbox Cognition Battery was administered using an iPad ([www.nihtoolbox.org](http://www.nihtoolbox.org)). The battery comprised of several tests including the Picture Sequence Memory Test (PSMT) (Boake, 2000) for assessing episodic memory, Auditory Verbal Learning Test (Rey) (Dikmen, 2014) for testing memory recall and Symbol Digit Modalities Test (SDMT) (Weintraub et al., 2013) for assessing processing speed. The PSMT involved presentation of sequences of pictured objects and activities in a fixed order on the iPad screen and simultaneously verbally described. The participant must remember and then reproduce the sequences over three trials. Scores on these measures are strongly correlated to scores from well-established "gold standard" measures of episodic memory. The Rey test involves auditory presentation of a list of unrelated words and asking participants to immediately recall as many words as possible following the presentation of the words. The SDMT consists of a series of nine symbols presented at the top of a standard sheet of paper, each paired with a single digit. The rest of the sheet contains symbols not matched to a digit, and participants were asked to say the digit corresponding with each symbol as quickly as possible and without making mistakes. The resulting score is equal to the number of correct matches over a period of 120 seconds.

## **dMRI acquisition and processing**

Multi-shell dMRI were acquired for all participants, with isotropic  $2\text{ mm}^3$  spatial resolution. The pulse sequence included 119 total directions comprising 80 diffusion gradient directions with  $b=2855\text{ s/mm}^2$ , 30 diffusion gradient directions with  $b=710\text{ s/mm}^2$  and nine images without diffusion weighting ( $b=0\text{ s/mm}^2$ ). To facilitate EPI distortion correction an additional scan was acquired in the opposite phase encoding direction and included 6 diffusion gradient directions ( $b=2855\text{ s/mm}^2$ ) and two non-diffusion-weighted images. Other dMRI parameters are as follows: TR/TE=2800/78ms, FOV=22.4cm, matrix size=112x112, and 63 axial slices with simultaneous multi-slice acceleration factor of 3. T1-weighted images were acquired in the sagittal plane using a three-dimensional GE BRAVO sequence at a resolution of  $1\times 1\times 1\text{ mm}$ , with  $256\times 256$  field of view. Intracranial brain volume for all participants was calculated on T1-weighted images using the FreeSurfer Software Suite, version 6.0 (<http://surfer.nmr.mgh.harvard.edu/>). dMRI data preprocessing was implemented in FSL ([fsl.fmrib.ox.ac.uk/fsl/fslwiki/](http://fsl.fmrib.ox.ac.uk/fsl/fslwiki/)) and MRTrix3 ([mrtrix.org](http://mrtrix.org)) and included denoising, geometric EPI distortion, eddy current distortion, slice-by-slice motion correction, outlier detection and bias field correction (ANTs N4BiasField Correction). Diffusion gradients were then adjusted to account for the rotation applied to the measurements during motion correction and a tensor model was fit for each voxel's data using the diffusion kurtosis (DK) model. DK is an extension of the diffusion tensor model that accounts for the non-Gaussian behavior of water in heterogeneous tissue containing multiple barriers to diffusion and it may be useful for investigating neurodegenerative diseases (Jensen and Helpert, 2010). To quantify the potential effects of motion, the participants with mean slice-by-slice root mean square displacement  $>1.5\text{mm}$  were excluded from the analysis. We also tested for differences in motion across groups



and observed no group differences between aMCI and control groups. Multi-tissue constrain spherical deconvolution was used to estimate the fiber orientation distributions (FODs) on aligned and distortion corrected dMRI data using average tissue response function. Probabilistic tractography was performed in MRtrix (3.0) using white matter FOD images to generate a whole-brain connectome for each subject.

### **White matter tract identification**

The Automated Fiber Quantification (AFQ, v1.1, [github.com/yeatmanlab/AFQ/wiki](https://github.com/yeatmanlab/AFQ/wiki)) (Yeatman et al., 2012; Huber et al., 2018) software package was used to segment the whole brain connectome of fiber tracts and quantify tissue properties along each tract. AFQ uses a two way-point ROI procedure to define 19 white matter tracts in which each fiber from the whole-brain connectome becomes a candidate for a specific fiber group if it passes through two ROIs that define the trajectory of the fiber group (Wakana et al., 2004). Next, each candidate fiber that passes through regions of the white matter that are unlikely to be part of the tract was removed to define only the tract fibers at the central position and fibers with length greater than three standard deviations from the mean fiber length were removed. The diffusion metrics (FA, MD, AD and RD) were then projected onto the segmented white matter fibers generated by AFQ. The FA and MD metrics describe the directional coherence and magnitude of water diffusion, respectively. FA (dimensionless index) is increased when water molecules tend to diffuse with greater directional coherence in the presence of well-myelinated axons. Tissue loss lowers the local barriers to the movement of water molecules that causes an increase in the magnitude of diffusion, and MD ( $\mu m^2/s$ ) is increased. AD ( $\mu m^2/s$ ) and RD ( $\mu m^2/s$ ) refer to the magnitude of water diffusion parallel and perpendicular to fiber tracts, respectively.

## **Validation of the qT1 Sequence**

The qT1 measurements have been previously validated against the standard IR spin-echo EPI sequence (Mezer et al., 2013). The figures below show a comparison of the whole brain qT1 measurements between the two methods. We see a good correspondence of the T1 values, particularly in the gray matter and white matter. The mean T1 is 1392.9 (117.2) ms and 980.4 (99.0) ms with the qT1 sequence, versus 1387.6 (153.6) ms and 974 (101.4) ms with the IR EPI sequence. The overall Pearson's correlation coefficient between the two datasets is 0.82, with an RMSE of 216 ms.

**Figure S3.** T1 map of a single subject using the qT1 sequence (top row) and the standard IR spin-echo EPI sequence (bottom row).

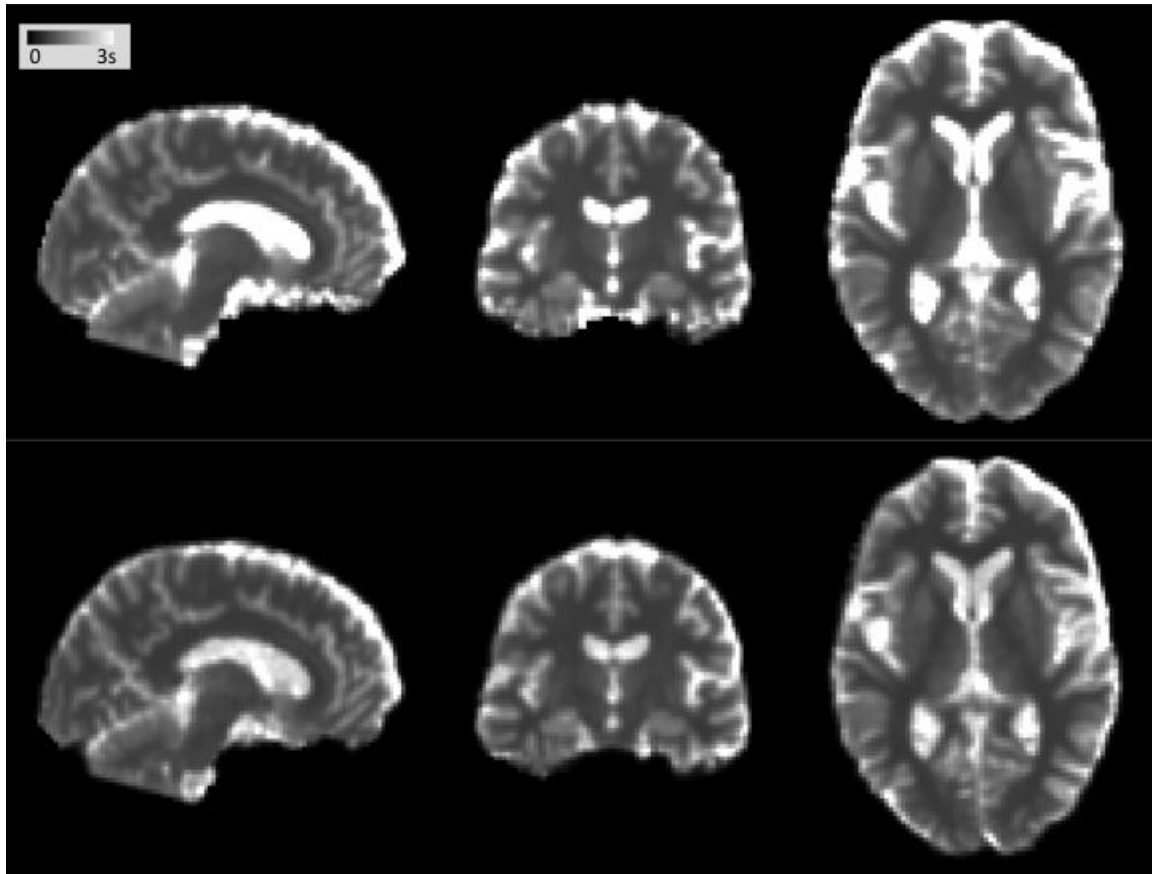

**Figure S4.** Correlation between the measured T1 values using the qT1 sequence and the standard IR spin echo EPI sequence.

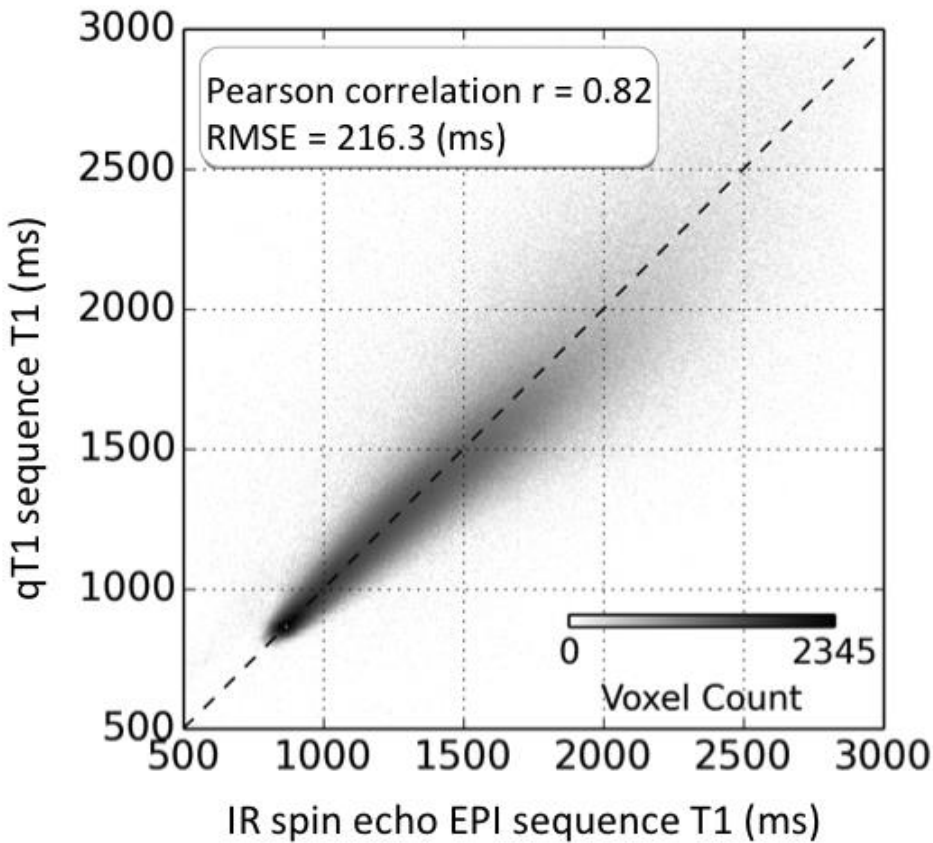

## Supplemental References

Boake, C., 2000. Edouard Claparede and the auditory verbal learning test. *Journal of Clinical and Experimental Neuropsychology* 22, 286-292.

Dikmen, S.S., Bauer, P.J., Weintraub, S., Mungas, D., Slotkin, J., Beaumont, J.L., Gershon, R., Temkin, N.R., Heaton, R.K., 2014. Measuring episodic memory across the lifespan: NIH toolbox picture sequence memory test. *Journal of the International Neuropsychological Society: JINS* 20, 611.

Huber, E., Donnelly, P.M., Rokem, A., Yeatman, J.D., 2018. Rapid and widespread white matter plasticity during an intensive reading intervention. *Nature communications* 9, 1-13.

Jensen, J.H., Helpert, J.A., 2010. MRI quantification of non-Gaussian water diffusion by kurtosis analysis. *NMR in Biomedicine* 23, 698-710.

Mezer, A., Yeatman, J.D., Stikov, N., Kay, K.N., Cho, N.-J., Dougherty, R.F., Perry, M.L., Parvizi, J., Hua, L.H., Butts-Pauly, K., 2013. Quantifying the local tissue volume and composition in individual brains with magnetic resonance imaging. *Nature medicine* 19, 1667-1672.

Wakana, S., Jiang, H., Nagae-Poetscher, L.M., Van Zijl, P.C., Mori, S., 2004. Fiber tract-based atlas of human white matter anatomy. *Radiology* 230, 77-87.

Weintraub, S., Dikmen, S.S., Heaton, R.K., Tulsky, D.S., Zelazo, P.D., Bauer, P.J., Carlozzi, N.E., Slotkin, J., Blitz, D., Wallner-Allen, K., 2013. Cognition assessment using the NIH Toolbox. *Neurology* 80, S54-S64.

Yeatman, J.D., Dougherty, R.F., Myall, N.J., Wandell, B.A., Feldman, H.M., 2012. Tract profiles of white matter properties: automating fiber-tract quantification. *PloS one* 7, e49790.
